# Supplementary material for: Integrated Microfluidic Devices Fabricated in Poly (Methyl Methacrylate) (PMMA) for On-site Therapeutic Drug Monitoring of Aminoglycosides in Whole Blood
Source: PubMed Central journal article supplement (PMC6468438; doi:10.3390/bios9010019), 2019-01-30
Supplement: biosensors-09-00019-s001.pdf [file biosensors-09-00019-s001.pdf]

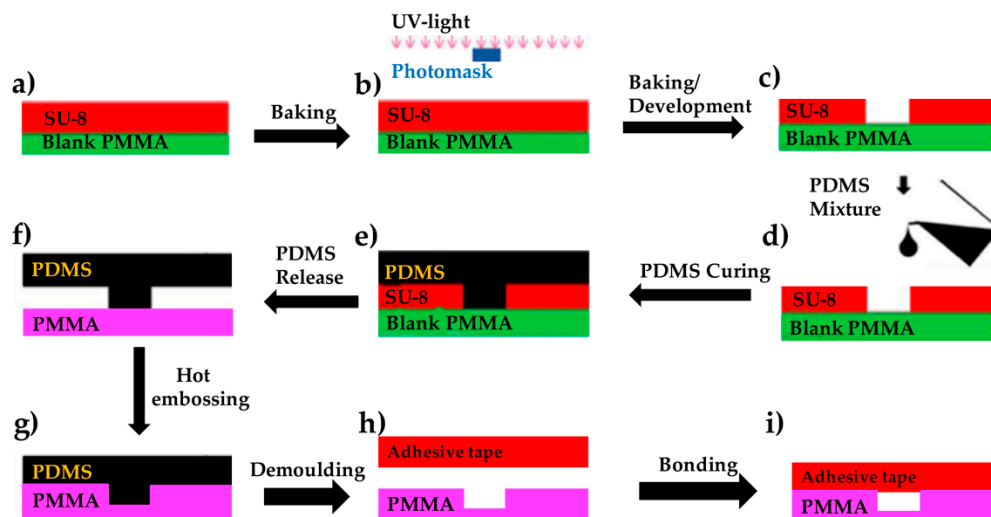

**Figure S1.** Schematic of the PMMA fabrication process.

(a) SU-8 2005/3025 is coated on a piece of PMMA. (b) The SU-8 layer is exposed to UV light and soft-baked. (c) The exposed resist is developed. (d) A mixture of (5:1) PDMS is casted onto the PMMA template. (e) The PDMS is placed in an oven and slowly cured. (f) The PDMS stamp is released and placed on a new piece of PMMA. (g) The PDMS and PMMA are compressed using the hot embosser. (h) The embossed PMMA with a microchannel is removed and a single-sided adhesive tape is used to bond it. (i) The final bonded PMMA-tape device.

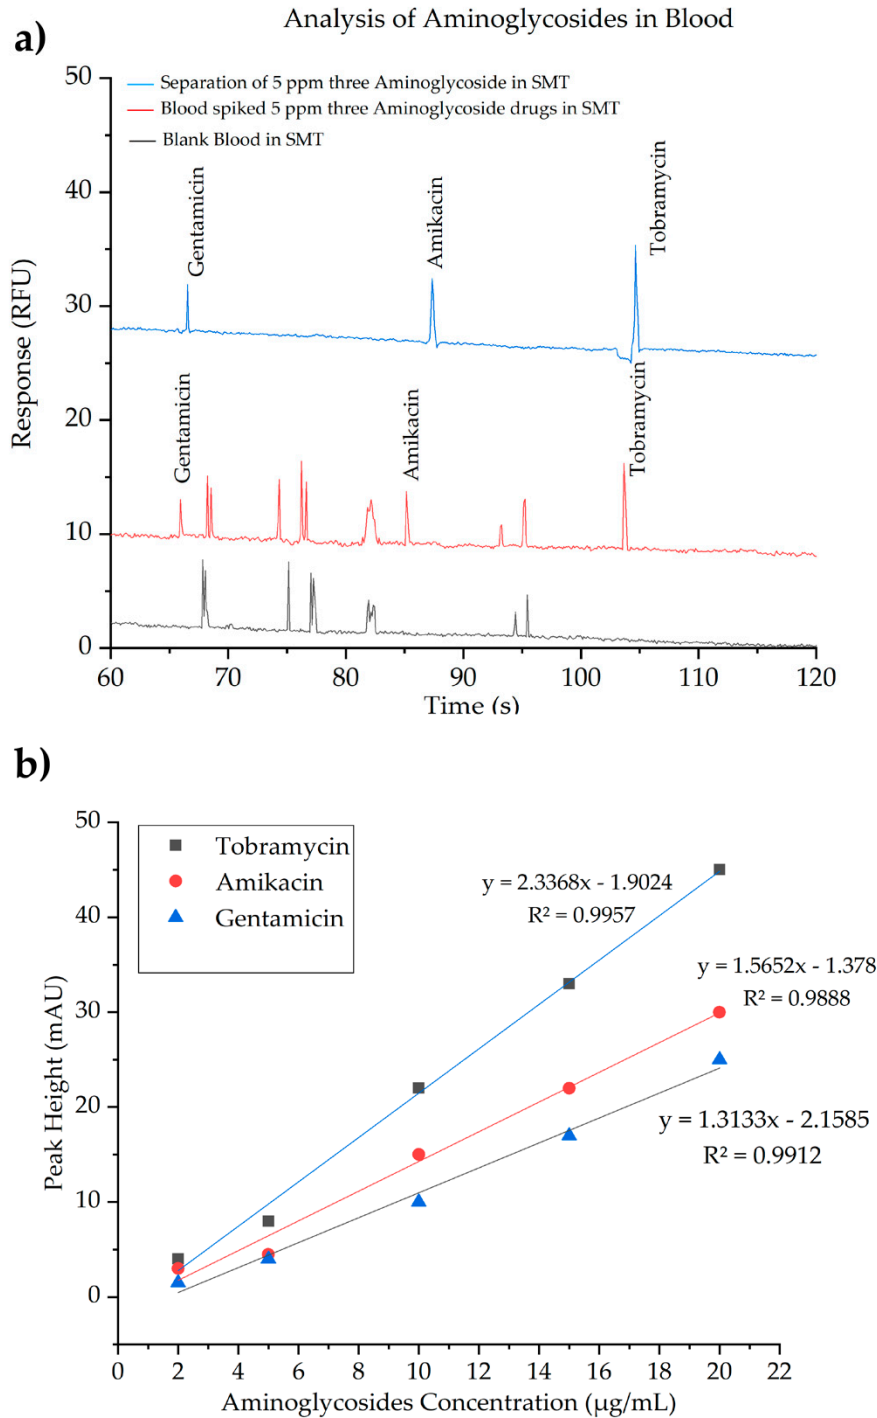

**Figure S2.** Analysis of Aminoglycosides from whole blood.

(a) Separation of 5  $\mu\text{g/mL}$  of three Aminoglycosides in SMT (blue). Whole blood spiked with 5  $\mu\text{g/mL}$  Aminoglycosides (red). Blank blood (black). (b) The linear calibration curve for the Aminoglycoside drugs Tobramycin (black), Amikacin (red), and Gentamicin (blue) from whole blood.
